# Supplementary material
Source: PubMed Central journal article supplement (PMC10333920)
Supplement: EIJ-D-22-01125_Grubb_SD.pdf [file EIJ-D-22-01125_Grubb_SD.pdf]

## Supplementary data

**Supplementary Table 1. *In vitro* neoskirt dimensions for S3-in-Evolut and Evolut-in-Evolut redo-TAVI.**

| Index Evolut | Second TAV   | S3 implant depth | Neoskirt height (mm) | Neoskirt width (mm) | Pinned leaflet length (mm) |
|--------------|--------------|------------------|----------------------|---------------------|----------------------------|
| 26 mm Evolut | 23 mm S3     | Node 4           | 17.1                 | 23.4                | 4                          |
|              |              | Node 5           | 21.0                 | 24.2                | 8                          |
|              |              | Node 6           | 23.4                 | 23.3                | 11                         |
| 29 mm Evolut | 26 mm S3     | Node 4           | 18.3                 | 25.8                | 5                          |
|              |              | Node 5           | 20.6                 | 26.5                | 7                          |
|              |              | Node 6           | 24.7                 | 25.6                | 11                         |
| 34 mm Evolut | 29 mm S3     | Node 4           | 19.9                 | 27.4                | 6                          |
|              |              | Node 5           | 23.0                 | 28.6                | 9                          |
|              |              | Node 6           | 27.0                 | 28.5                | 13                         |
| 26 mm Evolut | 26 mm Evolut | NA               | 26.2                 | NA                  | 13                         |
| 29 mm Evolut | 29 mm Evolut | NA               | 27.5                 | NA                  | 14                         |
| 34 mm Evolut | 34 mm Evolut | NA               | 28.9                 | NA                  | 15                         |

Neoskirt height was defined as the distance from the Evolut inflow to the pinned leaflet at the outflow of the S3. For Evolut in Evolut, the neoskirt height was defined as the distance from the Evolut inflow to the fully pinned leaflet height. Neoskirt width is the diameter of the Evolut after the S3 is placed inside. Neoskirt width of the Evolut in Evolut was determined by the post implant diameter of the Evolut on the CT scan. The pinned leaflet length was defined as the amount of first TAV's leaflet that is pinned.

**Supplementary Table 2. Post-TAVI CT measurements for S3-in-Evolut and Evolut-in-Evolut redo-TAVI.**

| <b>Dimensions (mm)</b>                       | <b>N</b> | <b>Mean ± SD</b> |
|----------------------------------------------|----------|------------------|
| <b>S3 in Evolut</b>                          |          |                  |
| LCA average height (midpoint)                | 204      | 20.74 ± 3.64     |
| RCA average height (midpoint)                | 204      | 22.00 ± 4.31     |
| Node 4 VTC LCA                               | 204      | 4.15 ± 1.97      |
| Node 4 VTC RCA                               | 194      | 3.19 ± 1.90      |
| Node 5 VTC LCA                               | 204      | 3.69 ± 1.94      |
| Node 5 VTC RCA                               | 194      | 2.73 ± 1.90      |
| Node 6 VTC LCA                               | 204      | 4.04 ± 1.91      |
| Node 6 VTC RCA                               | 194      | 3.07 ± 1.91      |
| Evolut inflow to top of left coronary sinus  | 204      | 25.61 ± 3.94     |
| Evolut inflow to top of right coronary sinus | 204      | 26.16 ± 4.55     |
| Node 4 VTSTJ LCA                             | 198      | 1.37 ± 1.75      |
| Node 4 VTSTJ RCA                             | 187      | 1.68 ± 1.74      |
| Node 5 VTSTJ LCA                             | 198      | 0.91 ± 1.71      |
| Node 5 VTSTJ RCA                             | 187      | 1.23 ± 1.73      |
| Node 6 VTSTJ LCA                             | 198      | 1.22 ± 1.71      |
| Node 6 VTSTJ RCA                             | 187      | 1.54 ± 1.74      |
| <b>Evolut in Evolut</b>                      |          |                  |
| VTC middle of LCA                            | 204      | 5.58 ± 2.13      |
| VTC middle of RCA                            | 194      | 5.06 ± 2.08      |
| VTSTJ above LCA                              | 198      | 2.12 ± 1.46      |
| VTSTJ above RCA                              | 187      | 2.82 ± 1.62      |
| VTA above LCA                                | 94       | 1.43 ± 0.91      |
| VTA above RCA                                | 94       | 2.46 ± 1.34      |

Mean anatomic measurements with a virtual TAV within an Evolut to determine risk of coronary flow compromise and access. Node level refers to the frame of the index Evolut. LCA and RCA average heights (midpoint) were measured from the index Evolut inflow plane. VTSTJ and VTA were only measured if neoskirt was above the STJ. LCA, left coronary artery; RCA, right coronary artery; VTC, valve-to-coronary distance; VTSTJ, valve-to-sinotubular junction distance; VTA, valve-to-aortic wall at neoskirt plane.

**Supplementary Table 3. CT-predicted risk of compromised coronary flow and access in patients undergoing S3-in-Evolut redo-TAVI by valve size.**

| <b>Index Evolut</b> | <b>Second TAV</b> | <b>S3 implant depth</b> | <b>N</b> | <b>Low risk of coronary flow compromise (%)</b> | <b>Low risk of coronary inaccessibility (%)</b> |
|---------------------|-------------------|-------------------------|----------|-------------------------------------------------|-------------------------------------------------|
| <b>26 mm Evolut</b> | <b>23 mm S3</b>   | Node 4                  | 43       |                                                 |                                                 |
| Left Coronary       |                   |                         |          | 86                                              | 65                                              |
| Right Coronary      |                   |                         |          | 79                                              | 77                                              |
| Both                |                   |                         |          | 74                                              | 58                                              |
| <b>26 mm Evolut</b> | <b>23 mm S3</b>   | Node 5                  | 43       |                                                 |                                                 |
| Left Coronary       |                   |                         |          | 28                                              | 21                                              |
| Right Coronary      |                   |                         |          | 21                                              | 12                                              |
| Both                |                   |                         |          | 28                                              | 14                                              |
| <b>26 mm Evolut</b> | <b>23 mm S3</b>   | Node 6                  | 43       |                                                 |                                                 |
| Left Coronary       |                   |                         |          | 16                                              | 2                                               |
| Right Coronary      |                   |                         |          | 21                                              | 9                                               |
| Both                |                   |                         |          | 12                                              | 2                                               |
| <b>29 mm Evolut</b> | <b>26 mm S3</b>   | Node 4                  | 89       |                                                 |                                                 |
| Left Coronary       |                   |                         |          | 84                                              | 74                                              |
| Right Coronary      |                   |                         |          | 88                                              | 85                                              |
| Both                |                   |                         |          | 79                                              | 70                                              |
| <b>29 mm Evolut</b> | <b>26 mm S3</b>   | Node 5                  | 89       |                                                 |                                                 |
| Left Coronary       |                   |                         |          | 72                                              | 53                                              |
| Right Coronary      |                   |                         |          | 69                                              | 63                                              |
| Both                |                   |                         |          | 62                                              | 46                                              |
| <b>29 mm Evolut</b> | <b>26 mm S3</b>   | Node 6                  | 89       |                                                 |                                                 |
| Left Coronary       |                   |                         |          | 45                                              | 11                                              |
| Right Coronary      |                   |                         |          | 44                                              | 19                                              |
| Both                |                   |                         |          | 33                                              | 6                                               |
| <b>34 mm Evolut</b> | <b>29 mm S3</b>   | Node 4                  | 72       |                                                 |                                                 |
| Left Coronary       |                   |                         |          | 89                                              | 75                                              |
| Right Coronary      |                   |                         |          | 90                                              | 83                                              |

|                     |                 |        |    |    |    |
|---------------------|-----------------|--------|----|----|----|
| Both                |                 |        |    | 85 | 71 |
| <b>34 mm Evolut</b> | <b>29 mm S3</b> | Node 5 | 72 |    |    |
| Left Coronary       |                 |        |    | 76 | 51 |
| Right Coronary      |                 |        |    | 71 | 67 |
| Both                |                 |        |    | 63 | 46 |
| <b>34 mm Evolut</b> | <b>29 mm S3</b> | Node 6 | 72 |    |    |
| Left Coronary       |                 |        |    | 38 | 7  |
| Right Coronary      |                 |        |    | 38 | 23 |
| Both                |                 |        |    | 23 | 3  |

**Supplementary Table 4. CT-predicted risk of compromised coronary flow and access in patients undergoing Evolut-in-Evolut redo-TAVI by valve size.**

| <b>Index Evolut</b> | <b>Second TAV</b>   | <b>N</b> | <b>Low risk of coronary flow compromise (%)</b> | <b>Low risk of coronary inaccessibility (%)</b> |
|---------------------|---------------------|----------|-------------------------------------------------|-------------------------------------------------|
| <b>26 mm Evolut</b> | <b>26 mm Evolut</b> | 43       |                                                 |                                                 |
| Left Coronary       |                     |          | 12                                              | 0                                               |
| Right Coronary      |                     |          | 26                                              | 2                                               |
| Both                |                     |          | 7                                               | 0                                               |
| <b>29 mm Evolut</b> | <b>29 mm Evolut</b> | 89       |                                                 |                                                 |
| Left Coronary       |                     |          | 38                                              | 2                                               |
| Right Coronary      |                     |          | 62                                              | 7                                               |
| Both                |                     |          | 33                                              | 1                                               |
| <b>34 mm Evolut</b> | <b>34 mm Evolut</b> | 72       |                                                 |                                                 |
| Left Coronary       |                     |          | 56                                              | 1                                               |
| Right Coronary      |                     |          | 58                                              | 7                                               |
| Both                |                     |          | 39                                              | 0                                               |

**Supplementary Table 5. Univariable pre-TAVI CT predictors of high risk of coronary flow compromise for S3 outflow at Evolut node 4 redo-TAVI by index Evolut valve size.**

|                                                         | 26mm Index Evolut<br>(N=43) |                      | 29mm Index Evolut<br>(N=89) |                      | 34mm Index Evolut<br>(N=72) |                         |
|---------------------------------------------------------|-----------------------------|----------------------|-----------------------------|----------------------|-----------------------------|-------------------------|
|                                                         | Odds ratio<br>(95% CI)      | P value <sup>1</sup> | Odds ratio<br>(95% CI)      | P value <sup>1</sup> | Odds ratio<br>(95% CI)      | P<br>value <sup>1</sup> |
| Aortic annulus perimeter<br>(mm)                        | 0.88<br>(0.62, 1.25)        | 0.466                | 0.79<br>(0.68, 0.91)        | <b>&lt;0.001</b>     | 0.89<br>(0.77, 1.01)        | 0.077                   |
| Aortic annulus perimeter-<br>derived diameter (mm)      | 0.65<br>(0.21, 2.00)        | 0.452                | 0.47<br>(0.30, 0.73)        | <b>&lt;0.001</b>     | 0.68<br>(0.45, 1.04)        | 0.075                   |
| Aortic annulus perimeter-<br>derived diameter ≤<br>23mm | 1.11<br>(0.13, 9.46)        | 0.927                | 6.86<br>(1.45, 32.38)       | <b>0.015</b>         | NA                          | NA                      |
| Valve oversizing (%)                                    | 1.08<br>(0.87, 1.34)        | 0.469                | 1.16<br>(1.06, 1.27)        | <b>&lt;0.001</b>     | 1.09<br>(0.99, 1.20)        | 0.066                   |
| SoV height at right<br>coronary (mm)                    | 0.69<br>(0.49, 0.97)        | <b>0.033</b>         | 0.75<br>(0.62, 0.91)        | <b>0.003</b>         | 0.87<br>(0.74, 1.03)        | 0.117                   |
| SoV height at left<br>coronary (mm)                     | 0.82<br>(0.60, 1.11)        | 0.193                | 0.80<br>(0.67, 0.96)        | <b>0.017</b>         | 0.78<br>(0.64, 0.97)        | <b>0.022</b>            |
| SoV height at non-<br>coronary (mm)                     | 0.71<br>(0.50, 1.01)        | 0.054                | 0.80<br>(0.67, 0.96)        | <b>0.016</b>         | 0.89<br>(0.74, 1.07)        | 0.209                   |
| Average SoV height<br>(mm)                              | 0.60<br>(0.38, 0.94)        | <b>0.027</b>         | 0.69<br>(0.55, 0.87)        | <b>0.002</b>         | 0.77<br>(0.61, 0.98)        | <b>0.032</b>            |
| Right coronary ostium<br>height (mm)                    | 0.73<br>(0.49, 1.08)        | 0.114                | 0.75<br>(0.62, 0.91)        | <b>0.003</b>         | 0.79<br>(0.63, 0.97)        | <b>0.028</b>            |
| Left coronary ostium<br>height (mm)                     | 0.96<br>(0.71, 1.30)        | 0.784                | 0.85<br>(0.72, 1.00)        | <b>0.048</b>         | 0.92<br>(0.77, 1.09)        | 0.338                   |

|                                                             | 26mm Index Evolut<br>(N=43) |                      | 29mm Index Evolut<br>(N=89) |                      | 34mm Index Evolut<br>(N=72) |                         |
|-------------------------------------------------------------|-----------------------------|----------------------|-----------------------------|----------------------|-----------------------------|-------------------------|
|                                                             | Odds ratio<br>(95% CI)      | P value <sup>1</sup> | Odds ratio<br>(95% CI)      | P value <sup>1</sup> | Odds ratio<br>(95% CI)      | P<br>value <sup>1</sup> |
| Average coronary ostium height (mm)                         | 0.72<br>(0.43, 1.20)        | 0.208                | 0.74<br>(0.60, 0.91)        | <b>0.004</b>         | 0.75<br>(0.57, 0.98)        | <b>0.036</b>            |
| SoV width at right coronary cusp (mm)                       | 0.84<br>(0.57, 1.23)        | 0.365                | 0.52<br>(0.38, 0.71)        | <b>&lt;0.001</b>     | 0.78<br>(0.63, 0.97)        | <b>0.025</b>            |
| SoV width left coronary cusp (mm)                           | 0.98<br>(0.67, 1.45)        | 0.923                | 0.53<br>(0.39, 0.72)        | <b>&lt;0.001</b>     | 0.74<br>(0.59, 0.94)        | <b>0.013</b>            |
| SoV width non-coronary cusp (mm)                            | 0.85<br>(0.56, 1.32)        | 0.476                | 0.41<br>(0.28, 0.61)        | <b>&lt;0.001</b>     | 0.75<br>(0.59, 0.96)        | <b>0.020</b>            |
| Average SoV width (mm)                                      | 0.86<br>(0.55, 1.35)        | 0.523                | 0.42<br>(0.28, 0.61)        | <b>&lt;0.001</b>     | 0.73<br>(0.56, 0.94)        | <b>0.014</b>            |
| Ascending aorta minor diameter (mm)                         | 1.15<br>(0.86, 1.53)        | 0.355                | 0.86<br>(0.72, 1.02)        | 0.083                | 0.86<br>(0.73, 1.01)        | 0.072                   |
| STJ max diameter (mm)                                       | 0.79<br>(0.55, 1.13)        | 0.191                | 0.75<br>(0.61, 0.93)        | <b>0.007</b>         | 0.83<br>(0.70, 0.99)        | <b>0.044</b>            |
| STJ minor diameter (mm)                                     | 0.82<br>(0.58, 1.15)        | 0.251                | 0.81<br>(0.68, 0.98)        | <b>0.029</b>         | 0.85<br>(0.70, 1.02)        | 0.076                   |
| Average STJ diameter (mm)                                   | 0.79<br>(0.55, 1.14)        | 0.208                | 0.78<br>(0.63, 0.95)        | <b>0.013</b>         | 0.83<br>(0.69, 1.00)        | 0.054                   |
| Aortic valve calcium volume (mm <sup>3</sup> ) <sup>2</sup> | 0.99<br>(0.96, 1.02)        | 0.522                | 0.99<br>(0.98, 1.00)        | 0.199                | 1.00<br>(0.99, 1.01)        | 0.932                   |
| Index Evolut depth of implant at NCC (mm) <sup>3</sup>      | 0.43<br>(0.25, 0.74)        | <b>0.002</b>         | 0.67<br>(0.53, 0.84)        | <b>&lt;0.001</b>     | 0.73<br>(0.60, 0.89)        | <b>0.002</b>            |

<sup>1</sup> Wald p value

<sup>2</sup> OR per 10 mm<sup>3</sup> increase in calcium volume

<sup>3</sup> CT-measured if available, otherwise fluoroscopy

SoV, sinus of Valsalva; STJ, sinotubular junction; NCC, non-coronary cusp
